# Supplementary material
Source: PubMed Central journal article supplement (PMC1315899)
Supplement: 4-embor771-s1.pdf [file 4-embor771-s1.pdf]

Supplementary information

**Supplementary table.** Pairs of primers used for cloning *trpF* and *hisA* of *E. coli*, and *priA* of *S. coelicolor* and *M. tuberculosis*.

| Primers (5' to 3')                                                | Restriction sites inserted in the 5' end | Gene (organism)                           | Cloning vector |
|-------------------------------------------------------------------|------------------------------------------|-------------------------------------------|----------------|
| GGAATTCATATGATTATTCCGGCATTAGA<br>CGGGATCCTGGAAGCGGTGATATCGTAGAACA | <i>NdeI</i> and <i>Bam</i> HI            | <i>hisA</i><br>( <i>E. coli</i> )         | pET3a          |
| CCGCTCGAGTGAAGCGGTGATATCGTAGAACA<br>GGAATTCATGATTATTCCGGCATTAGA   | <i>XhoI</i> and <i>EcoRI</i>             | <i>hisA</i><br>( <i>E. coli</i> )         | pGEX-4T-1      |
| CCGCTCGATGGACGCCCGGCATAGTTTTTCAG<br>GGAATTCATGGCCCATGACGATTTG     | <i>XhoI</i> and <i>EcoRI</i>             | <i>trpF</i><br>( <i>E. coli</i> )         | pGEX-4T-1      |
| CCCAAGCTTGGACGCCCGCTTCTACTT<br>CGGGATCCGGGCGAAACCGAAGGACTC        | <i>HindIII</i> and <i>Bam</i> HI         | <i>priA</i><br>( <i>S. coelicolor</i> )   | pMTL22         |
| CCGCTCGAGGGCGAAACCGAAGGACTC<br>CCGGAATTCATGAGCAAGCTCGAAGCTC       | <i>XhoI</i> and <i>EcoRI</i>             | <i>priA</i><br>( <i>S. coelicolor</i> )   | pGEX-4T-1      |
| CCCTCGAGTTCAACCAGCGGGGCAACCAAC<br>GGAATTCGTGATGCCGCTGATACTTTT     | <i>XhoI</i> and <i>EcoRI</i>             | <i>priA</i><br>( <i>M. tuberculosis</i> ) | pGEX-4T-1      |
